# Supplementary material for: The Gut Microbiome of Two Wild Bumble Bee Species Native of South America: Bombus pauloensis and Bombus bellicosus
Source: Springer Nature journal article supplement (doi:10.1007/s00248-024-02430-y), 2024-09-28
Supplement: MOESM1 [file 248_2024_2430_MOESM1_ESM.pdf]

Supplementary materials for:

## The gut microbiome of two wild bumblebee species native of South America: *Bombus pauloensis* and *Bombus bellicosus*

Gregorio Fernandez De Landa<sup>1,2</sup>, Daniele Alberoni<sup>3\*</sup>, Chiara Braglia<sup>3</sup>, Loredana Baffoni<sup>3</sup>, Mateo Fernandez de Landa<sup>1,2</sup>, Pablo Revainera<sup>1,2</sup>, Silvina Quintana<sup>1,2</sup>, Francisco Zumpano<sup>4</sup>, Matias Maggi<sup>1,2</sup>, Diana Di Gioia<sup>3</sup>.

<sup>1</sup> Facultad de Ciencias Exactas y Naturales, Centro Científico Tecnológico Mar del Plata, CONICET, Centro de Asociación Simple CIC PBA, Instituto de Investigaciones en Producción Sanidad y Ambiente (IIPROSAM), Facultad de Ciencias Exactas y Naturales, Universidad Nacional de Mar del Plata, Centro Científico Tecnológico Mar del Plata, CONICET. Centro de Asociación Simple CIC PBA, Mar del Plata, Argentina.

<sup>2</sup> Centro de Investigaciones en Abejas Sociales, Facultad de Ciencias Exactas y Naturales, Universidad Nacional de Mar del Plata, Mar del Plata, Argentina.

<sup>3</sup> Dipartimento di Scienze e Tecnologie Agro-Alimentari, University of Bologna, Viale Fanin 44, 40127, Bologna, Italy.

<sup>4</sup> Instituto de Investigaciones Marinas y Costeras (IIMyC), Facultad de Ciencias Exactas y Naturales, Universidad Nacional de Mar del Plata-CONICET. Funes 3350 Mar del Plata (7600), Argentina

\* Corresponding Author: [daniele.alberoni@unibo.it](mailto:daniele.alberoni@unibo.it)

**Supplementary table S1:** The table describes qPCR results on the gut pathogen *N. ceranae* and Eubacteria expressed in Log, and the amount of DNA extracted per sample expressed in ng/μl.

| Species              | Sampling Site | DNA Quantification (ng/μl) | <i>Nosema ceranae</i> units (Log) | Eubacteria (Log) |
|----------------------|---------------|----------------------------|-----------------------------------|------------------|
| <i>B. pauloensis</i> | NRP           | 5.78                       | 0.00                              | 7.385            |
| <i>B. pauloensis</i> | NRP           | 1.84                       | 0.00                              | 7.613            |
| <i>B. pauloensis</i> | NRP           | 3.19                       | 0.00                              | 8.520            |
| <i>B. pauloensis</i> | NRP           | 12.40                      | 4.89                              | 8.449            |
| <i>B. pauloensis</i> | NRP           | 72.00                      | 0.00                              | 9.726            |
| <i>B. pauloensis</i> | NRP           | 11.60                      | 0.00                              | 9.299            |
| <i>B. pauloensis</i> | NRP           | 75.3                       | 4.82                              | 8.187            |
| <i>B. pauloensis</i> | NRP           | 48.7                       | 8.24                              | 10.207           |
| <i>B. pauloensis</i> | NRP           | 7.67                       | 5.14                              | 9.576            |
| <i>B. pauloensis</i> | NRP           | 47.50                      | 4.89                              | 8.436            |
| <i>B. pauloensis</i> | SP            | 163.00                     | 6.29                              | 8.998            |
| <i>B. pauloensis</i> | SP            | 30.80                      | 5.26                              | 8.260            |
| <i>B. pauloensis</i> | SP            | 217.00                     | 7.17                              | 8.067            |
| <i>B. pauloensis</i> | SP            | 8.87                       | 4.35                              | 9.446            |
| <i>B. pauloensis</i> | SP            | 31.30                      | 5.42                              | 8.790            |
| <i>B. pauloensis</i> | SP            | 86.70                      | 5.26                              | 8.600            |
| <i>B. pauloensis</i> | SP            | 22.50                      | 6.15                              | 8.325            |
| <i>B. pauloensis</i> | SP            | 15.80                      | 5.17                              | 9.138            |
| <i>B. pauloensis</i> | SP            | 221.00                     | 8.52                              | 9.394            |
| <i>B. pauloensis</i> | SP            | 15.7                       | 8.21                              | 8.743            |
| <i>B. pauloensis</i> | VA            | 9.47                       | 7.44                              | 8.363            |
| <i>B. pauloensis</i> | VA            | 7.13                       | 5.21                              | 9.490            |
| <i>B. pauloensis</i> | VA            | 27.20                      | 4.86                              | 8.063            |
| <i>B. pauloensis</i> | VA            | 27.10                      | 7.19                              | 9.713            |
| <i>B. pauloensis</i> | VA            | 3.44                       | 4.9                               | 7.385            |
| <i>B. pauloensis</i> | VA            | 3.00                       | 4.55                              | 7.613            |
| <i>B. pauloensis</i> | VA            | 9.47                       | 5.13                              | 8.520            |
| <i>B. pauloensis</i> | VA            | 2.01                       | 6.59                              | 8.449            |
| <i>B. pauloensis</i> | VA            | 14.00                      | 7.45                              | 9.726            |
| <i>B. pauloensis</i> | VA            | 109.00                     | 4.25                              | 9.299            |
| <i>B. belicosus</i>  | NRP           | 14.90                      | 4.84                              | 8.169            |
| <i>B. belicosus</i>  | NRP           | 3.03                       | 4.47                              | 7.727            |
| <i>B. belicosus</i>  | NRP           | 1.68                       | 5.01                              | 8.064            |
| <i>B. belicosus</i>  | NRP           | 1.88                       | 4.67                              | 7.689            |
| <i>B. belicosus</i>  | NRP           | 1.15                       | 0.00                              | 9.507            |
| <i>B. belicosus</i>  | NRP           | 14.30                      | 4.72                              | 9.213            |
| <i>B. belicosus</i>  | NRP           | 15.00                      | 4.93                              | 7.974            |
| <i>B. belicosus</i>  | NRP           | 1.35                       | 4.87                              | 9.792            |
| <i>B. belicosus</i>  | NRP           | 10.30                      | 0.00                              | 8.169            |
| <i>B. belicosus</i>  | NRP           | 15.20                      | 6.06                              | 7.727            |

**Supplementary table S2:** Table with complete list of primers used for PCR and qPCR analysis

| TARGET                              | PRIMER NAME    | SEQUENCE                                                   | AMPLICON MELTING TEMPERATURE | ANNEALING TEMPERATURE | AMPLICON SIZE | References                                    |
|-------------------------------------|----------------|------------------------------------------------------------|------------------------------|-----------------------|---------------|-----------------------------------------------|
| <i>Lotmaria passim</i>              | qCrFw1 153     | 5'- TCCACTCTGCAAACGATGAC -3'                               | 87.0                         | 56                    | 153           | <a href="#">Arismendi et al., 2016</a>        |
|                                     | qCrRev1 153    | 5'- GGGCCGAATGGAAAAGATAC -3'                               |                              |                       |               |                                               |
| <i>Ascospaera spp.</i>              | AscoAll1       | 5'- GCACTCCCACCCTTGCTA -3'                                 | 89.8                         | 58                    | 550           | <a href="#">James &amp; Skinner 2005</a>      |
|                                     | AscoAll2       | 5'- GAACACGACGCCGTCAC -3'                                  |                              |                       |               |                                               |
| <i>Acarapis woody</i>               | AcarFor        | 5'- CGGGCCCGAGCTTATTTTACTGCTG -3'                          | 78.5                         | 57                    | 162           | <a href="#">Garrido-Bailón et al., 2012</a>   |
|                                     | AcarRev        | 5'- GCGCCTGTCAATCCACCTACAGAA -3'                           |                              |                       |               |                                               |
| <i>Nosema apis</i>                  | 321 apis Fw    | 5'- GGGGGCATGTCTTTGACGTACTATGTA -3'                        | 84.3                         | 60                    | 321           | <a href="#">Martín-Hernández et al., 2007</a> |
|                                     | 321 apis Rev   | 5'- GGGGGGCGTTTAAAAATGTGAAACAACATG -3'                     |                              |                       |               |                                               |
| <i>Nosema cerenae</i>               | 218mitoc Fw    | 5'- CGGCGACGATGTGATATGAAAATATTA -3'                        | 77.0                         | 60                    | 218           | <a href="#">Martín-Hernández et al., 2007</a> |
|                                     | 218mitoc Rev   | 5'- CCCGGTCATTCTCAAACAAAAACCG -3'                          |                              |                       |               |                                               |
| <i>Apicystis bombi</i>              | ApBF1293 Fw    | 5'- CGTACTGCCCTGAATACTCCAG -3'                             | 81.7                         | 58                    | 293           | <a href="#">Meeus et al, 2018</a>             |
|                                     | ApBR1293 Rv    | 5'- TGAAAGCGGCGTATACATGA -3'                               |                              |                       |               |                                               |
| <i>Crithidia bombi</i>              | Crithidia119fw | 5'- CCAACGGTGAGCCGCATTCAGT -3'                             | 83.7                         | 58                    | 119           | <a href="#">Huang et al., 2015</a>            |
|                                     | Crithidia119rv | 5'- CGCGTGTCGCCAGAACATTGA -3'                              |                              |                       |               |                                               |
| <i>Nosema bombi</i>                 | NBom323 fw     | 5'- CCATGCATGTTTTTGAAGATTATTAT -3'                         | 78.1                         | 56                    | 323           | <a href="#">Klee et al., 2006</a>             |
|                                     | NBom 323 rv    | 5'- CATATATTTTTTAAAAATATGAAACAATAA -3'                     |                              |                       |               |                                               |
| AmFV                                | AmFV 551 -F    | 5'- CAGAGAATTCGGTTTTTGTGAGTG -3'                           | 84.7                         | 52                    | 551           | <a href="#">Hartmann et al., 2015</a>         |
|                                     | AmFV 551 -R    | 5'- CATGGTGCCCAAGTCTTGCT -3'                               |                              |                       |               |                                               |
| Eubacteria                          | Eub338-F       | 5'- ACTCCTACGGGAGGCAGCAG-3'                                | -                            | 60                    | 200           | <a href="#">Favaro et al., 2023</a>           |
|                                     | Eub518-R       | 5'- ATTACCGCGGCTGCTGG -3'                                  |                              |                       |               |                                               |
| 16S rRNA region V7-V8 with adapters | 799F           | 5'- TCGTCGGCAGCGTCAGATGTGTATAAGAGACAGAACMGGATTAGATACCCG -3 |                              |                       | 470 and 720   |                                               |
|                                     | 1139R          | 5'- GTCTCGTGGGCTCGGAGATGTGTATAAGAGACAGACGTCATCCCCACCTTC -3 |                              |                       |               |                                               |

**Supplementary table S3:** Relative abundance at Phylum level. The sampling sites reported: Natural Reserve Paititi (NRP); Santa Paula's Farm (SP); Vivero Antoniucci (VA)

| Sample |               |                      | Phylum         |            |              |                  |        |
|--------|---------------|----------------------|----------------|------------|--------------|------------------|--------|
| Code   | Sampling site | Bumblebee Specie     | Proteobacteria | Firmicutes | Bacteroidota | Actinobacteriota | Others |
| BB71   | NRP           | <i>B. bellicosus</i> | 0.9573         | 0.0208     | 0.0008       | 0.0082           | 0.0129 |
| BB72   | NRP           | <i>B. bellicosus</i> | 0.9346         | 0.0346     | 0.0017       | 0.0229           | 0.0063 |
| BB90   | NRP           | <i>B. bellicosus</i> | 0.9385         | 0.0336     | 0.0007       | 0.0173           | 0.0099 |
| BB91   | NRP           | <i>B. bellicosus</i> | 0.8773         | 0.0612     | 0.0016       | 0.0424           | 0.0176 |
| BB92   | NRP           | <i>B. bellicosus</i> | 0.7529         | 0.0164     | 0.0010       | 0.2250           | 0.0047 |
| BB93   | NRP           | <i>B. bellicosus</i> | 0.7626         | 0.0947     | 0.0001       | 0.1302           | 0.0124 |
| BB94   | NRP           | <i>B. bellicosus</i> | 0.9318         | 0.0347     | 0.0000       | 0.0179           | 0.0157 |
| BB96   | NRP           | <i>B. bellicosus</i> | 0.5242         | 0.0412     | 0.4267       | 0.0069           | 0.0010 |
| BP02   | NRP           | <i>B. pauloensis</i> | 0.6551         | 0.1022     | 0.0449       | 0.1955           | 0.0023 |
| BP04   | NRP           | <i>B. pauloensis</i> | 0.7568         | 0.1800     | 0.0038       | 0.0525           | 0.0069 |
| BP06   | NRP           | <i>B. pauloensis</i> | 0.9106         | 0.0751     | 0.0001       | 0.0143           | 0.0000 |
| BP07   | NRP           | <i>B. pauloensis</i> | 0.5060         | 0.2953     | 0.0018       | 0.1960           | 0.0009 |
| BP08   | NRP           | <i>B. pauloensis</i> | 0.5721         | 0.3259     | 0.0024       | 0.0988           | 0.0009 |
| BP09   | NRP           | <i>B. pauloensis</i> | 0.2460         | 0.6098     | 0.1105       | 0.0336           | 0.0001 |
| BP11   | SP            | <i>B. pauloensis</i> | 0.9217         | 0.0405     | 0.0004       | 0.0253           | 0.0120 |
| BP13   | SP            | <i>B. pauloensis</i> | 0.6517         | 0.2444     | 0.0000       | 0.1029           | 0.0010 |
| BP15   | SP            | <i>B. pauloensis</i> | 0.8879         | 0.0445     | 0.0003       | 0.0673           | 0.0000 |
| BP16   | SP            | <i>B. pauloensis</i> | 0.5903         | 0.3432     | 0.0000       | 0.0665           | 0.0000 |
| BP17   | SP            | <i>B. pauloensis</i> | 0.3713         | 0.6017     | 0.0025       | 0.0240           | 0.0005 |
| BP18   | SP            | <i>B. pauloensis</i> | 0.8913         | 0.0847     | 0.0006       | 0.0234           | 0.0000 |
| BP19   | SP            | <i>B. pauloensis</i> | 0.7091         | 0.2211     | 0.0004       | 0.0695           | 0.0000 |
| BP20   | VA            | <i>B. pauloensis</i> | 0.6511         | 0.3296     | 0.0000       | 0.0193           | 0.0000 |
| BP21   | VA            | <i>B. pauloensis</i> | 0.5903         | 0.3571     | 0.0258       | 0.0262           | 0.0007 |
| BP22   | VA            | <i>B. pauloensis</i> | 0.5556         | 0.0991     | 0.3313       | 0.0136           | 0.0004 |
| BP23   | VA            | <i>B. pauloensis</i> | 0.5103         | 0.4864     | 0.0003       | 0.0026           | 0.0004 |
| BP24   | VA            | <i>B. pauloensis</i> | 0.7719         | 0.1985     | 0.0002       | 0.0292           | 0.0004 |
| BP25   | VA            | <i>B. pauloensis</i> | 0.6510         | 0.0766     | 0.2555       | 0.0168           | 0.0000 |
| BP26   | VA            | <i>B. pauloensis</i> | 0.8704         | 0.0089     | 0.0000       | 0.1197           | 0.0010 |
| BP27   | VA            | <i>B. pauloensis</i> | 0.8560         | 0.1258     | 0.0000       | 0.0182           | 0.0000 |
| BP28   | VA            | <i>B. pauloensis</i> | 0.9910         | 0.0048     | 0.0010       | 0.0015           | 0.0016 |
| BP03   | NRP           | <i>B. pauloensis</i> | 0.7293         | 0.2142     | 0.0454       | 0.0086           | 0.0024 |
| BP30   | VA            | <i>B. pauloensis</i> | 0.9120         | 0.0617     | 0.0047       | 0.0148           | 0.0069 |

**Supplementary table S4:** Relative abundance at Family level. The sampling sites reported: Natural Reserve Paititi (NRP); Santa Paula’s Farm (SP); Vivero Antoniucci (VA)

| Sample |               |                      | Family        |                  |                |                  |                  |          |               |                    |                 |                   |             |
|--------|---------------|----------------------|---------------|------------------|----------------|------------------|------------------|----------|---------------|--------------------|-----------------|-------------------|-------------|
| Code   | Sampling site | Bumblebee Specie     | Neisseriaceae | Pseudomonadaceae | Morganellaceae | Enterobacterales | Lactobacillaceae | Orbaceae | Weeksellaceae | Bifidobacteriaceae | Anaplasmataceae | Pectobacteriaceae | Erwiniaceae |
| BB71   | NRP           | <i>B. bellicosus</i> | 0.348         | 0.517            | 0.000          | 0.025            | 0.014            | 0.037    | 0.001         | 0.002              | 0.004           | 0.002             | 0.000       |
| BB72   | NRP           | <i>B. bellicosus</i> | 0.665         | 0.112            | 0.000          | 0.021            | 0.024            | 0.110    | 0.000         | 0.017              | 0.005           | 0.002             | 0.000       |
| BB90   | NRP           | <i>B. bellicosus</i> | 0.675         | 0.094            | 0.013          | 0.018            | 0.031            | 0.107    | 0.001         | 0.013              | 0.005           | 0.002             | 0.001       |
| BB91   | NRP           | <i>B. bellicosus</i> | 0.523         | 0.133            | 0.005          | 0.037            | 0.055            | 0.104    | 0.001         | 0.011              | 0.006           | 0.002             | 0.000       |
| BB92   | NRP           | <i>B. bellicosus</i> | 0.006         | 0.079            | 0.042          | 0.016            | 0.016            | 0.011    | 0.001         | 0.220              | 0.010           | 0.004             | 0.571       |
| BB93   | NRP           | <i>B. bellicosus</i> | 0.495         | 0.088            | 0.015          | 0.009            | 0.093            | 0.137    | 0.000         | 0.124              | 0.001           | 0.000             | 0.000       |
| BB94   | NRP           | <i>B. bellicosus</i> | 0.491         | 0.145            | 0.006          | 0.053            | 0.013            | 0.092    | 0.000         | 0.000              | 0.003           | 0.000             | 0.091       |
| BB96   | NRP           | <i>B. bellicosus</i> | 0.478         | 0.010            | 0.001          | 0.002            | 0.038            | 0.028    | 0.427         | 0.007              | 0.001           | 0.001             | 0.003       |
| BP02   | NRP           | <i>B. pauloensis</i> | 0.248         | 0.044            | 0.001          | 0.030            | 0.101            | 0.095    | 0.044         | 0.190              | 0.026           | 0.013             | 0.000       |
| BP03   | NRP           | <i>B. pauloensis</i> | 0.043         | 0.226            | 0.004          | 0.145            | 0.206            | 0.026    | 0.045         | 0.001              | 0.156           | 0.065             | 0.001       |
| BP04   | NRP           | <i>B. pauloensis</i> | 0.267         | 0.143            | 0.006          | 0.122            | 0.171            | 0.048    | 0.003         | 0.039              | 0.077           | 0.048             | 0.001       |
| BP06   | NRP           | <i>B. pauloensis</i> | 0.309         | 0.001            | 0.510          | 0.002            | 0.075            | 0.087    | 0.000         | 0.014              | 0.001           | 0.000             | 0.000       |
| BP07   | NRP           | <i>B. pauloensis</i> | 0.375         | 0.003            | 0.064          | 0.004            | 0.294            | 0.057    | 0.002         | 0.196              | 0.002           | 0.000             | 0.000       |
| BP08   | NRP           | <i>B. pauloensis</i> | 0.269         | 0.110            | 0.022          | 0.051            | 0.324            | 0.045    | 0.002         | 0.095              | 0.043           | 0.019             | 0.000       |
| BP09   | NRP           | <i>B. pauloensis</i> | 0.091         | 0.003            | 0.034          | 0.002            | 0.610            | 0.112    | 0.111         | 0.034              | 0.001           | 0.000             | 0.000       |
| BP11   | SP            | <i>B. pauloensis</i> | 0.889         | 0.019            | 0.001          | 0.010            | 0.041            | 0.003    | 0.000         | 0.026              | 0.006           | 0.004             | 0.000       |
| BP13   | SP            | <i>B. pauloensis</i> | 0.579         | 0.020            | 0.010          | 0.013            | 0.245            | 0.017    | 0.000         | 0.100              | 0.007           | 0.000             | 0.000       |
| BP15   | SP            | <i>B. pauloensis</i> | 0.860         | 0.004            | 0.006          | 0.001            | 0.044            | 0.011    | 0.000         | 0.067              | 0.003           | 0.000             | 0.001       |
| BP16   | SP            | <i>B. pauloensis</i> | 0.572         | 0.003            | 0.007          | 0.002            | 0.341            | 0.003    | 0.000         | 0.067              | 0.002           | 0.000             | 0.000       |
| BP17   | SP            | <i>B. pauloensis</i> | 0.189         | 0.014            | 0.004          | 0.009            | 0.603            | 0.142    | 0.002         | 0.015              | 0.004           | 0.000             | 0.000       |
| BP18   | SP            | <i>B. pauloensis</i> | 0.762         | 0.007            | 0.007          | 0.004            | 0.085            | 0.106    | 0.000         | 0.021              | 0.002           | 0.000             | 0.000       |
| BP19   | SP            | <i>B. pauloensis</i> | 0.581         | 0.018            | 0.080          | 0.008            | 0.218            | 0.005    | 0.000         | 0.068              | 0.016           | 0.000             | 0.000       |
| BP20   | VA            | <i>B. pauloensis</i> | 0.603         | 0.007            | 0.002          | 0.003            | 0.328            | 0.032    | 0.000         | 0.018              | 0.003           | 0.000             | 0.000       |
| BP21   | VA            | <i>B. pauloensis</i> | 0.451         | 0.005            | 0.005          | 0.004            | 0.357            | 0.116    | 0.026         | 0.021              | 0.004           | 0.002             | 0.001       |
| BP22   | VA            | <i>B. pauloensis</i> | 0.375         | 0.036            | 0.000          | 0.020            | 0.098            | 0.084    | 0.331         | 0.010              | 0.026           | 0.007             | 0.000       |
| BP23   | VA            | <i>B. pauloensis</i> | 0.001         | 0.012            | 0.002          | 0.012            | 0.417            | 0.002    | 0.000         | 0.000              | 0.012           | 0.004             | 0.001       |
| BP24   | VA            | <i>B. pauloensis</i> | 0.742         | 0.001            | 0.000          | 0.002            | 0.197            | 0.026    | 0.000         | 0.029              | 0.001           | 0.000             | 0.000       |
| BP25   | VA            | <i>B. pauloensis</i> | 0.533         | 0.007            | 0.000          | 0.000            | 0.076            | 0.109    | 0.256         | 0.017              | 0.000           | 0.000             | 0.000       |
| BP26   | VA            | <i>B. pauloensis</i> | 0.669         | 0.168            | 0.001          | 0.004            | 0.009            | 0.010    | 0.000         | 0.119              | 0.001           | 0.000             | 0.006       |
| BP27   | VA            | <i>B. pauloensis</i> | 0.759         | 0.004            | 0.000          | 0.000            | 0.126            | 0.090    | 0.000         | 0.018              | 0.000           | 0.000             | 0.000       |
| BP28   | VA            | <i>B. pauloensis</i> | 0.000         | 0.520            | 0.000          | 0.315            | 0.004            | 0.000    | 0.001         | 0.000              | 0.019           | 0.129             | 0.000       |
| BP30   | VA            | <i>B. pauloensis</i> | 0.003         | 0.339            | 0.003          | 0.047            | 0.042            | 0.459    | 0.001         | 0.000              | 0.025           | 0.013             | 0.001       |

**Supplementary table S5:** Relative abundance at genus level. The sampling sites reported: Natural Reserve Paititi (NRP); Santa Paula´s Farm (SP); Vivero Antoniucci (VA)

| Sample |               |                      | Genera    |              |                 |             |          |               |         |             |                |               |         |           |        |
|--------|---------------|----------------------|-----------|--------------|-----------------|-------------|----------|---------------|---------|-------------|----------------|---------------|---------|-----------|--------|
| Code   | Sampling site | Bumblebee Specie     | Apibacter | Arsenophonus | Bifidobacterium | Gilliamella | Kluyvera | Lactobacillus | Pantoea | Pseudomonas | Rosenbergiella | Snodgrassella | Sodalis | Wolbachia | Others |
| BB71   | NRP           | <i>B. bellicosus</i> | 0.03      | 0.00         | 0.21            | 3.32        | 0.00     | 1.43          | 0.00    | 51.65       | 0.00           | 34.72         | 0.23    | 0.38      | 8.05   |
| BB72   | NRP           | <i>B. bellicosus</i> | 0.00      | 0.00         | 1.55            | 5.00        | 0.00     | 2.43          | 0.00    | 11.22       | 0.00           | 66.50         | 0.25    | 0.48      | 12.56  |
| BB90   | NRP           | <i>B. bellicosus</i> | 0.03      | 1.27         | 1.23            | 8.03        | 0.00     | 3.13          | 0.00    | 9.35        | 0.00           | 67.22         | 0.21    | 0.49      | 9.04   |
| BB91   | NRP           | <i>B. bellicosus</i> | 0.00      | 0.50         | 1.09            | 8.79        | 0.00     | 5.49          | 0.05    | 13.31       | 0.00           | 52.30         | 0.25    | 0.58      | 17.66  |
| BB92   | NRP           | <i>B. bellicosus</i> | 0.00      | 4.22         | 21.94           | 0.28        | 0.00     | 1.59          | 26.56   | 7.90        | 13.21          | 0.54          | 0.36    | 1.00      | 22.39  |
| BB93   | NRP           | <i>B. bellicosus</i> | 0.00      | 1.51         | 12.31           | 12.5        | 0.00     | 9.26          | 0.00    | 8.74        | 0.00           | 49.18         | 0.00    | 0.12      | 6.30   |
| BB94   | NRP           | <i>B. bellicosus</i> | 0.00      | 0.65         | 0.03            | 2.19        | 0.00     | 1.33          | 3.54    | 14.44       | 5.06           | 49.03         | 0.00    | 0.35      | 23.39  |
| BB96   | NRP           | <i>B. bellicosus</i> | 42.67     | 0.05         | 0.65            | 2.57        | 0.00     | 3.84          | 0.00    | 1.04        | 0.06           | 47.57         | 0.06    | 0.07      | 1.41   |
| BP02   | NRP           | <i>B. pauloensis</i> | 0.00      | 0.14         | 2.52            | 0.00        | 0.00     | 4.01          | 0.00    | 1.83        | 0.00           | 87.85         | 0.36    | 0.59      | 2.67   |
| BP03   | NRP           | <i>B. pauloensis</i> | 0.00      | 0.98         | 9.94            | 1.41        | 0.00     | 24.35         | 0.00    | 2.05        | 0.00           | 57.82         | 0.00    | 0.71      | 2.74   |
| BP04   | NRP           | <i>B. pauloensis</i> | 0.00      | 0.64         | 6.73            | 0.10        | 0.00     | 4.38          | 0.00    | 0.43        | 0.00           | 86.00         | 0.00    | 0.25      | 1.46   |
| BP06   | NRP           | <i>B. pauloensis</i> | 0.00      | 0.71         | 6.65            | 0.32        | 0.00     | 34.14         | 0.00    | 0.34        | 0.00           | 57.24         | 0.00    | 0.19      | 0.40   |
| BP07   | NRP           | <i>B. pauloensis</i> | 0.00      | 0.44         | 1.49            | 3.49        | 0.00     | 60.17         | 0.00    | 1.43        | 0.00           | 18.86         | 0.00    | 0.44      | 13.68  |
| BP08   | NRP           | <i>B. pauloensis</i> | 0.00      | 0.74         | 2.13            | 10.50       | 0.00     | 8.45          | 0.00    | 0.66        | 0.00           | 76.25         | 0.00    | 0.25      | 1.03   |
| BP09   | NRP           | <i>B. pauloensis</i> | 0.00      | 7.98         | 6.76            | 0.39        | 0.00     | 21.77         | 0.00    | 1.75        | 0.00           | 58.06         | 0.00    | 1.65      | 1.64   |
| BP11   | SP            | <i>B. pauloensis</i> | 4.02      | 0.12         | 18.92           | 6.44        | 0.00     | 10.08         | 0.00    | 4.36        | 0.00           | 24.81         | 1.30    | 2.63      | 27.32  |
| BP13   | SP            | <i>B. pauloensis</i> | 0.00      | 0.19         | 1.78            | 2.25        | 0.00     | 32.82         | 0.00    | 0.71        | 0.00           | 60.23         | 0.00    | 0.34      | 1.68   |
| BP15   | SP            | <i>B. pauloensis</i> | 2.42      | 0.49         | 2.11            | 11.10       | 0.00     | 35.64         | 0.00    | 0.52        | 0.12           | 45.09         | 0.23    | 0.39      | 1.88   |
| BP16   | SP            | <i>B. pauloensis</i> | 33.09     | 0.03         | 0.99            | 1.78        | 0.00     | 9.81          | 0.00    | 3.56        | 0.00           | 37.48         | 0.74    | 2.56      | 9.94   |
| BP17   | SP            | <i>B. pauloensis</i> | 0.00      | 0.22         | 0.00            | 0.04        | 19.27    | 41.64         | 0.00    | 1.23        | 0.11           | 0.12          | 0.40    | 1.25      | 35.72  |
| BP18   | SP            | <i>B. pauloensis</i> | 0.00      | 0.04         | 2.86            | 2.50        | 0.00     | 19.73         | 0.00    | 0.13        | 0.00           | 74.17         | 0.00    | 0.08      | 0.50   |
| BP19   | SP            | <i>B. pauloensis</i> | 25.55     | 0.03         | 1.66            | 4.40        | 0.00     | 7.65          | 0.00    | 0.72        | 0.00           | 53.28         | 0.00    | 0.03      | 6.68   |
| BP20   | VA            | <i>B. pauloensis</i> | 0.00      | 0.13         | 11.90           | 0.99        | 0.00     | 0.89          | 0.00    | 16.82       | 0.61           | 66.78         | 0.00    | 0.07      | 1.81   |
| BP21   | VA            | <i>B. pauloensis</i> | 0.00      | 0.00         | 1.81            | 6.76        | 0.00     | 12.58         | 0.00    | 0.36        | 0.00           | 75.85         | 0.00    | 0.00      | 2.63   |
| BP22   | VA            | <i>B. pauloensis</i> | 0.00      | 0.04         | 0.00            | 0.00        | 0.00     | 0.39          | 0.00    | 51.97       | 0.00           | 0.00          | 12.89   | 1.90      | 32.81  |
| BP23   | VA            | <i>B. pauloensis</i> | 4.03      | 0.35         | 0.05            | 1.50        | 0.00     | 20.59         | 0.08    | 22.57       | 0.00           | 4.24          | 6.49    | 15.5      | 24.54  |
| BP24   | VA            | <i>B. pauloensis</i> | 0.00      | 0.32         | 0.00            | 0.00        | 0.00     | 4.22          | 0.05    | 33.65       | 0.05           | 0.25          | 1.26    | 2.46      | 57.74  |
| BP25   | VA            | <i>B. pauloensis</i> | 0.00      | 0.62         | 3.91            | 2.69        | 0.00     | 17.00         | 0.09    | 14.23       | 0.00           | 26.56         | 4.82    | 7.68      | 22.41  |
| BP26   | VA            | <i>B. pauloensis</i> | 0.00      | 51.04        | 1.40            | 7.35        | 0.00     | 7.49          | 0.00    | 0.11        | 0.00           | 30.88         | 0.00    | 0.14      | 1.59   |
| BP27   | VA            | <i>B. pauloensis</i> | 0.02      | 6.35         | 19.32           | 5.58        | 0.00     | 29.41         | 0.00    | 0.30        | 0.00           | 37.49         | 0.00    | 0.22      | 1.30   |
| BP28   | VA            | <i>B. pauloensis</i> | 0.00      | 2.15         | 9.49            | 4.05        | 0.00     | 32.38         | 0.00    | 11.04       | 0.00           | 26.85         | 1.93    | 4.27      | 7.83   |

**Supplementary table S6: Generalized Unifrac beta diversity, pairwise comparison of groups.** The sampling sites reported: Natural Reserve Paititi (NRP); Santa Paula's Farm (SP); Vivero Antonucci (VA). p-values: \*  $p < 0.05$ ; \*\*\*  $p < 0.01$ .

| <b>Group_1</b>           | <b>Group_2</b>          | <b>Sample size</b> | <b>Permutations</b> | <b>pseudo-F</b> | <b>p-value</b> | <b>q-value</b> |
|--------------------------|-------------------------|--------------------|---------------------|-----------------|----------------|----------------|
|                          | <i>B. paulensis</i> RPN | 15                 | 999                 | 2.161524        | 0.291          | 0.292          |
| <i>B. bellicosus</i> RPN | <i>B. paulensis</i> SP  | 16                 | 999                 | 3.672724        | 0.031          | 0.093          |
|                          | <i>B. paulensis</i> VA  | 17                 | 999                 | 2.625976        | 0.292          | 0.292          |
| <i>B. paulensis</i> RPN  | <i>B. paulensis</i> SP  | 15                 | 999                 | 11.745693       | 0.004 *        | 0.024          |
|                          | <i>B. paulensis</i> VA  | 16                 | 999                 | 3.024549        | 0.207          | 0.292          |
| <i>B. paulensis</i> SP   | <i>B. paulensis</i> VA  | 17                 | 999                 | 4.755364        | 0.063          | 0.126          |

**Supplementary table S7:** Table summarizing the sample identification code and the NCBI Sequence Read Archive (SRA) accession number

| Sample Code | Sampling site | Bumblebee Specie     | NCBI accession number       |
|-------------|---------------|----------------------|-----------------------------|
| BB71        | NRP           | <i>B. bellicosus</i> | <a href="#">SRR17715434</a> |
| BB72        | NRP           | <i>B. bellicosus</i> | <a href="#">SRR17715423</a> |
| BB90        | NRP           | <i>B. bellicosus</i> | <a href="#">SRR17715412</a> |
| BB91        | NRP           | <i>B. bellicosus</i> | <a href="#">SRR17715401</a> |
| BB92        | NRP           | <i>B. bellicosus</i> | <a href="#">SRR17715481</a> |
| BB93        | NRP           | <i>B. bellicosus</i> | <a href="#">SRR17715470</a> |
| BB94        | NRP           | <i>B. bellicosus</i> | <a href="#">SRR17715459</a> |
| BB96        | NRP           | <i>B. bellicosus</i> | <a href="#">SRR17715448</a> |
| BP02        | NRP           | <i>B. pauloensis</i> | <a href="#">SRR17715433</a> |
| BP04        | NRP           | <i>B. pauloensis</i> | <a href="#">SRR17715431</a> |
| BP06        | NRP           | <i>B. pauloensis</i> | <a href="#">SRR17715430</a> |
| BP07        | NRP           | <i>B. pauloensis</i> | <a href="#">SRR17715429</a> |
| BP08        | NRP           | <i>B. pauloensis</i> | <a href="#">SRR17715428</a> |
| BP09        | NRP           | <i>B. pauloensis</i> | <a href="#">SRR17715427</a> |
| BP11        | SP            | <i>B. pauloensis</i> | <a href="#">SRR17715425</a> |
| BP13        | SP            | <i>B. pauloensis</i> | <a href="#">SRR17715422</a> |
| BP15        | SP            | <i>B. pauloensis</i> | <a href="#">SRR17715421</a> |
| BP16        | SP            | <i>B. pauloensis</i> | <a href="#">SRR17715420</a> |
| BP17        | SP            | <i>B. pauloensis</i> | <a href="#">SRR17715419</a> |
| BP18        | SP            | <i>B. pauloensis</i> | <a href="#">SRR17715418</a> |
| BP19        | SP            | <i>B. pauloensis</i> | <a href="#">SRR17715417</a> |
| BP20        | VA            | <i>B. pauloensis</i> | <a href="#">SRR17715416</a> |
| BP21        | VA            | <i>B. pauloensis</i> | <a href="#">SRR17715415</a> |
| BP22        | VA            | <i>B. pauloensis</i> | <a href="#">SRR17715414</a> |
| BP23        | VA            | <i>B. pauloensis</i> | <a href="#">SRR17715413</a> |
| BP24        | VA            | <i>B. pauloensis</i> | <a href="#">SRR17715411</a> |
| BP25        | VA            | <i>B. pauloensis</i> | <a href="#">SRR17715410</a> |
| BP26        | VA            | <i>B. pauloensis</i> | <a href="#">SRR17715409</a> |
| BP27        | VA            | <i>B. pauloensis</i> | <a href="#">SRR17715408</a> |
| BP28        | VA            | <i>B. pauloensis</i> | <a href="#">SRR17715407</a> |
| BP03        | NRP           | <i>B. pauloensis</i> | <a href="#">SRR17715432</a> |
| BP30        | VA            | <i>B. pauloensis</i> | <a href="#">SRR17715406</a> |



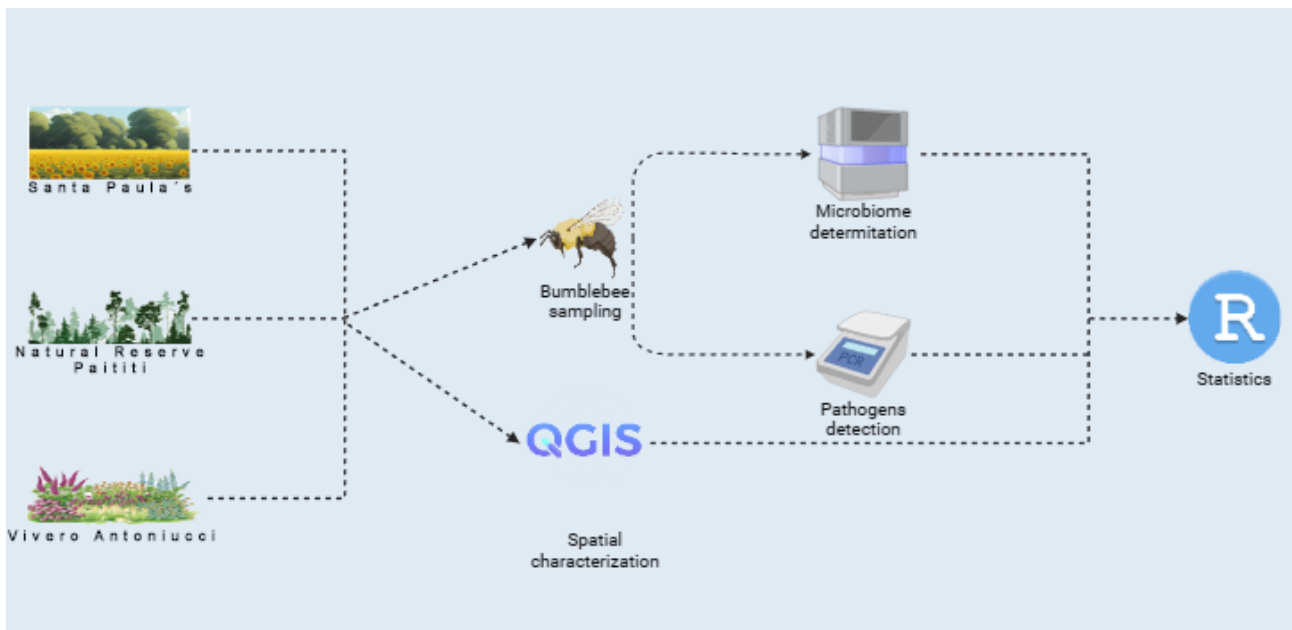

**Supplementary figure S1:** Workflow of the presented research illustrating the sampling sites and the analysis carried out.

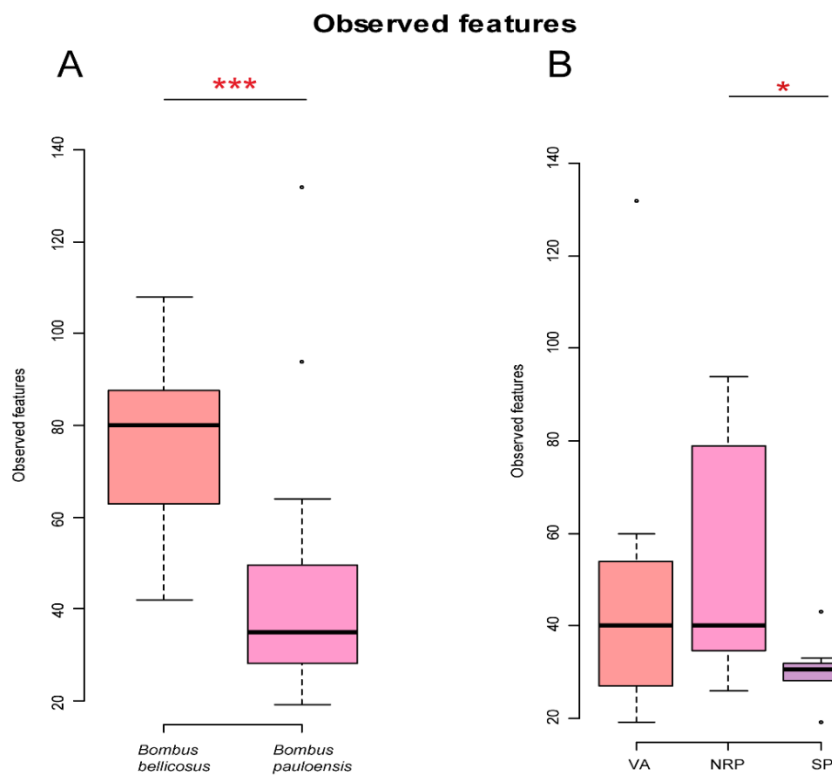

**Supplementary figure S2:  $\alpha$ -diversity indexes.** A) Comparing *B. pauloensis* (n= 24) and *B. bellicosus* (n=8) with Observed features. B) Comparing the different sampling sites Vivero Antoniucci [VA] vs Reserva Natural Paititi [NRP] vs Santa Paula [SP] Observed features. p-values: \* p<0.05; \*\*\* p<0.01.

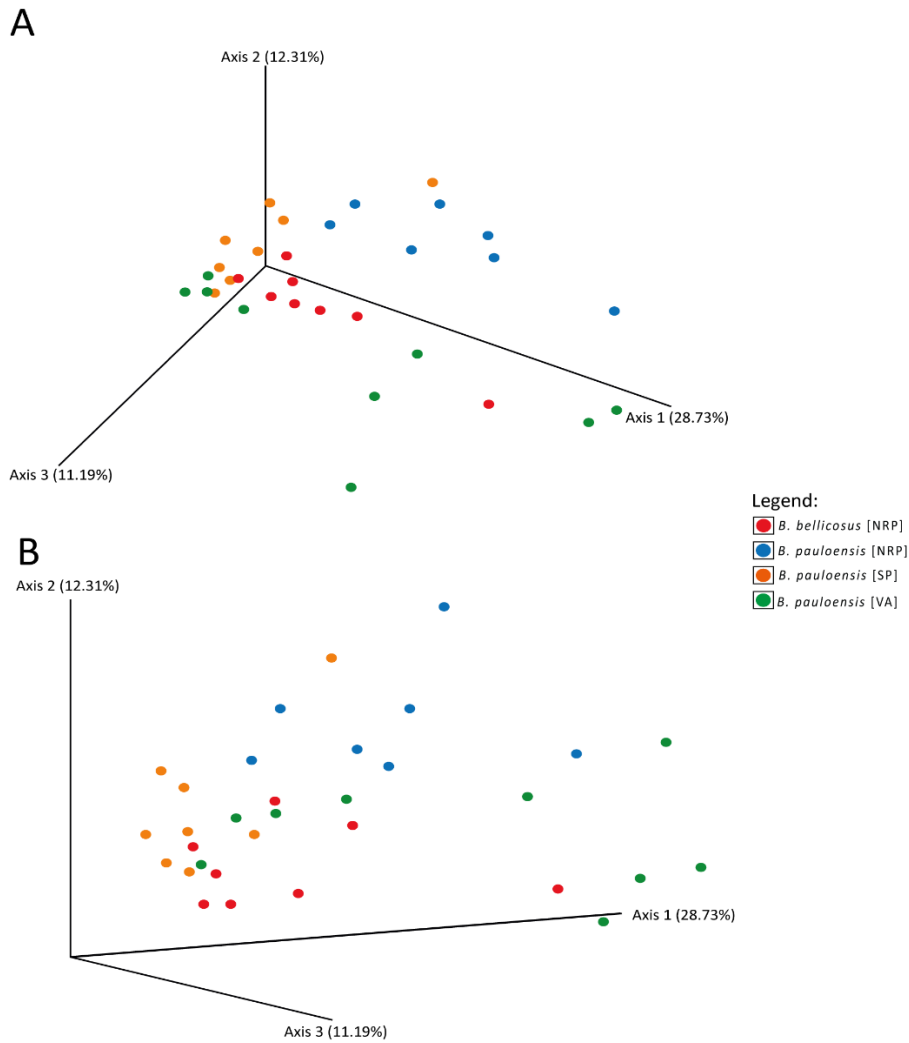

**Supplementary figure S3: PCoA illustrating the Bray-Curtis  $\beta$ -Diversity.** PCoA reports Bray-Curtis index for *B. pauloensis* sampled in Vivero Antoniucci [VA] (n= 9), Reserva Natural Paititi [NRP] (n=7) and Santa Paula [SP] (n=8), and for *B. bellicosus* sampled in [NRP]. Figure A) shows the samples distribution on axes 1-3, whereas, B) shows the same samples distribution on axes 1-2

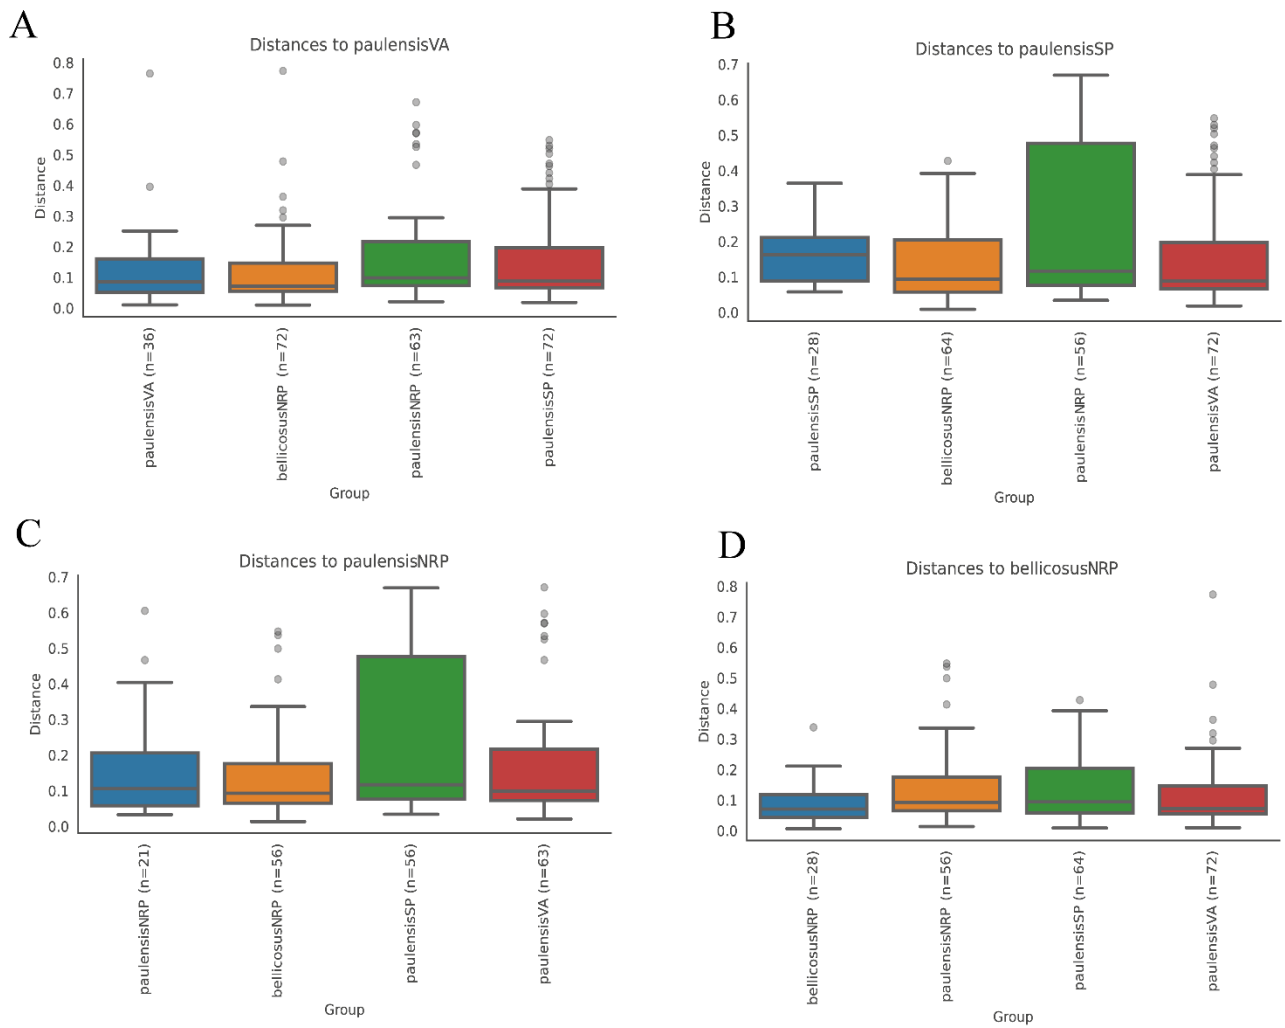

**Supplementary figure S4: Generalized Unifrac.** A) *B. paulensis* VA vs all sites and species. B) *B. paulensis* SP vs all sites and species.

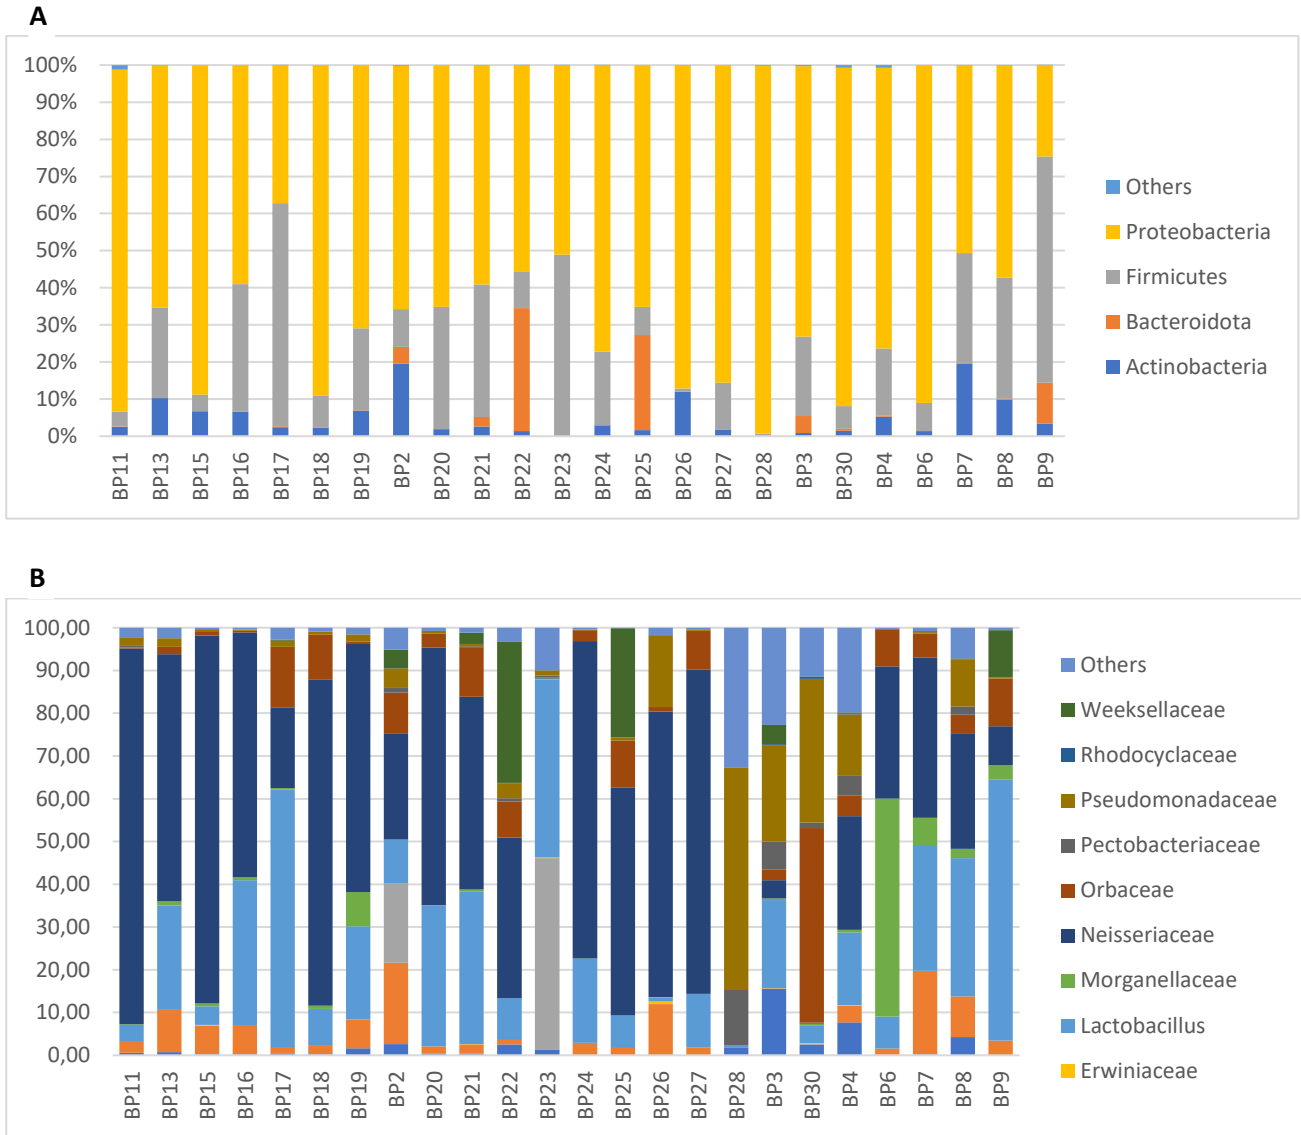

**Supplementary figure S5: Diversity of the gut microbiota of *Bombus pauloensis*.** Overlaid bar chart representing in percentage the composition of the microbiota (Y-axis) of each analyzed individual of *B. pauloensis* species (X-axis), for the different taxonomic levels studied, Phylum (A) and Family (B) level

**A**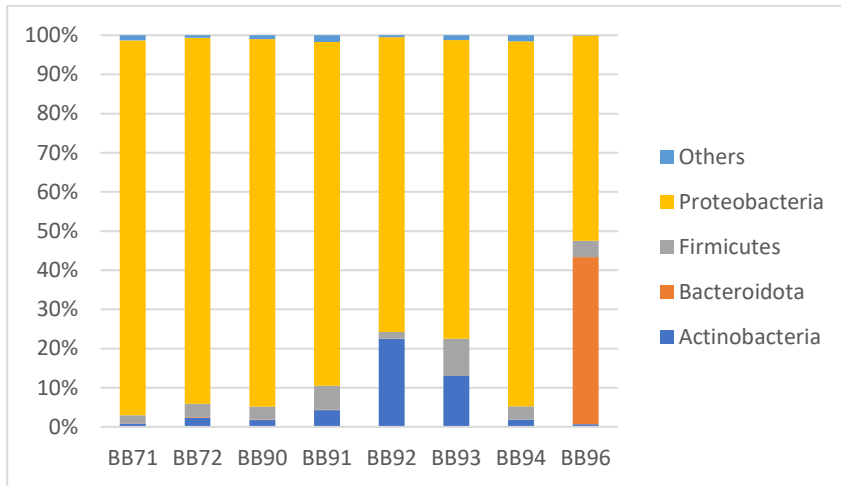**B**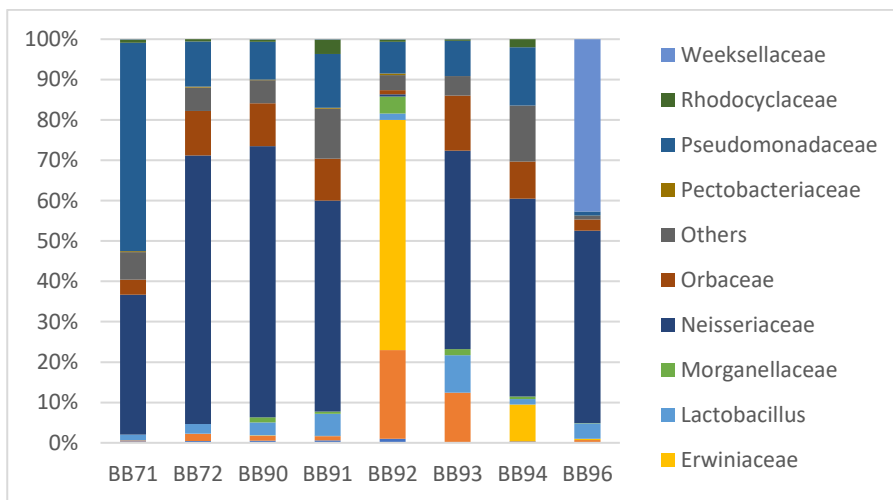

**Supplementary figure S6: Diversity of the gut microbiota of *Bombus bellicosus*.** Overlaid bar chart representing in percentage the composition of the microbiota (Y-axis) of each analyzed individual of *B. bellicosus* species (X-axis), for the different taxonomic levels studied, Phylum (A) and Family (B) level

Differential abundance analysis *Bombus bellicosus* VS *Bombus pauloensis* (NRP)

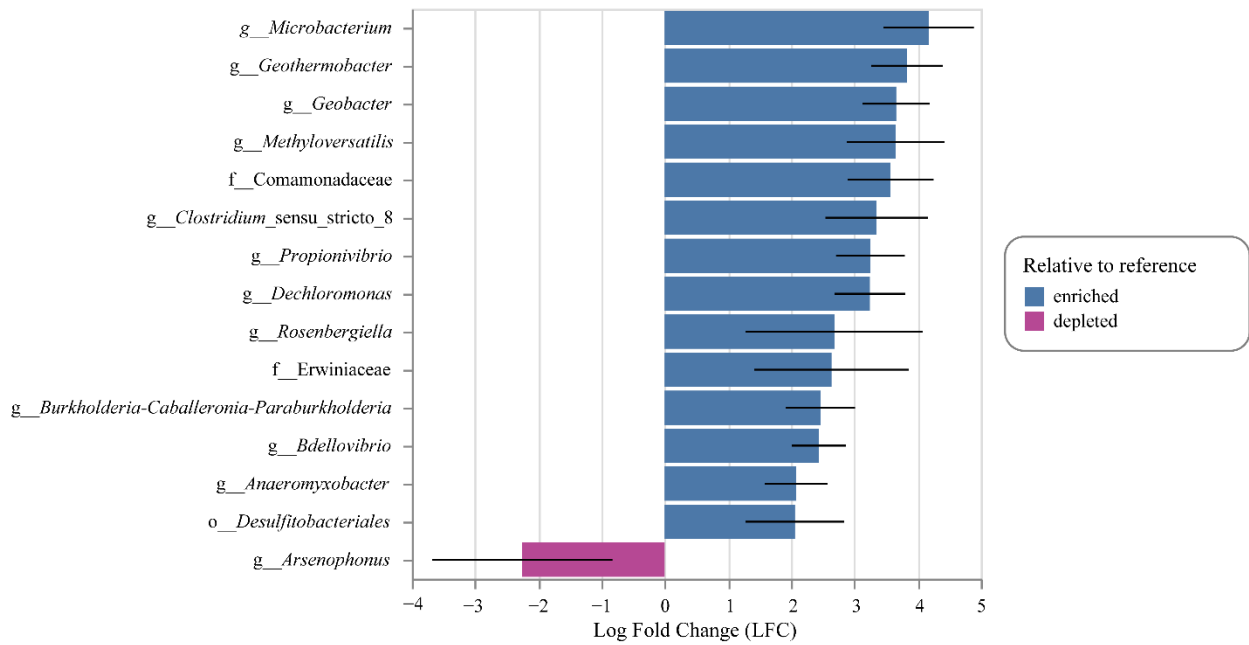

**Supplementary figure S7:** Differential abundance analysis (DAA) *Bombus bellicosus* compared to *Bombus pauloensis* in NRP sampling site. Only the differential values above Log Fold Change (LFC) of 2 are shown.

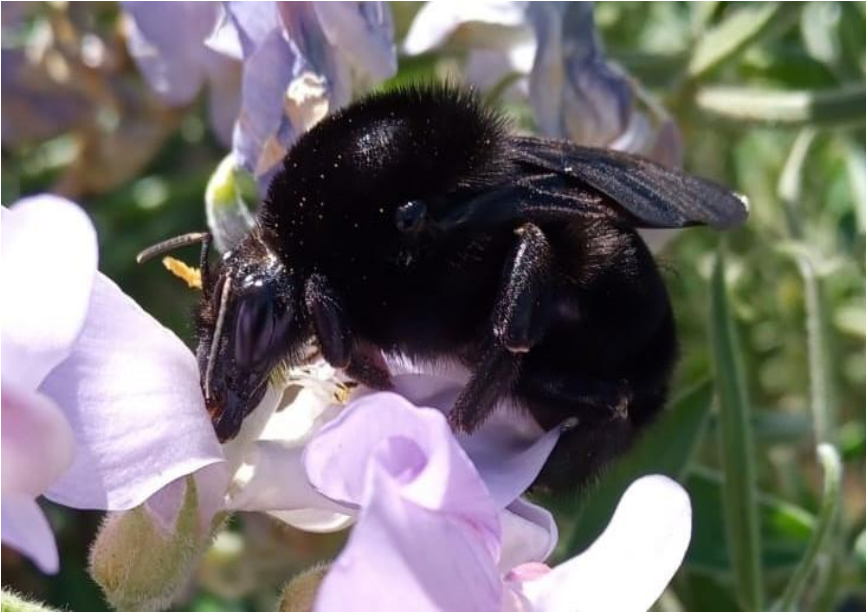

**Supplementary figure S8:** *Bombus pauloensis* foraging on a Leguminosae (Reserva Natural Paititi – Buenos Aires province December 2023)

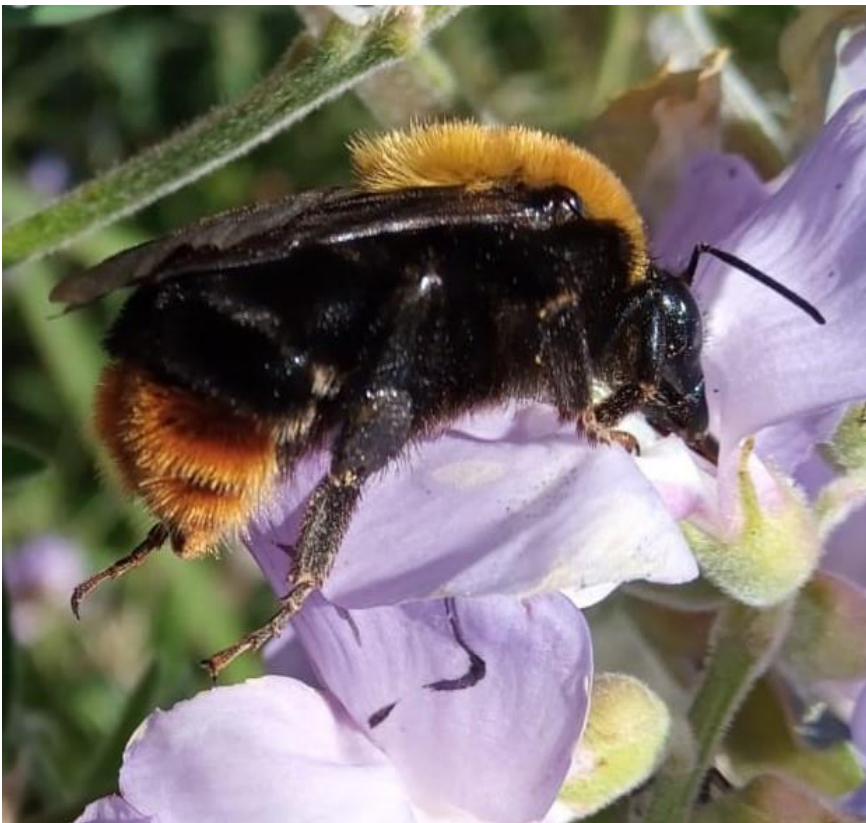

**Supplementary figure S9:** *Bombus bellicosus* foraging on a Leguminosae (Reserva Natural Paititi – Buenos Aires province, December 2023)

## References:

- Arismendi, N., Bruna, A., Zapata, N., & Vargas, M. (2016). PCR-specific detection of recently described *Lotmaria passim* (Trypanosomatidae) in Chilean apiaries. *Journal of invertebrate pathology*, 134, 1-5. <https://doi.org/10.1016/j.jip.2015.12.008>
- James, R. R., & Skinner, J. S. (2005). PCR diagnostic methods for *Ascospaera* infections in bees. *Journal of Invertebrate Pathology*, 90(2), 98-103. <https://doi.org/10.1016/j.jip.2005.08.004>
- Martín-Hernández, R., Meana, A., Prieto, L., Salvador, A. M., Garrido-Bailón, E., & Higes, M. (2007). Outcome of colonization of *Apis mellifera* by *Nosema ceranae*. *Applied and environmental microbiology*, 73(20), 6331-6338. <https://doi.org/10.1128/AEM.00270-07>
- Huang, W. F., Skyrn, K., Ruitter, R., & Solter, L. (2015). Disease management in commercial bumble bee mass rearing, using production methods, multiplex PCR detection techniques, and regulatory assessment. *Journal of Apicultural Research*, 54(5), 516-524. <https://doi.org/10.1080/00218839.2016.1173352>
- Klee, J., Tay, W. T., & Paxton, R. J. (2006). Specific and sensitive detection of *Nosema bombi* (Microsporidia: Nosematidae) in bumble bees (*Bombus* spp.; Hymenoptera: Apidae) by PCR of partial rRNA gene sequences. *Journal of Invertebrate Pathology*, 91(2), 98-104. <https://doi.org/10.1016/j.jip.2005.10.012>
- Hartmann, U., Forsgren, E., Charrière, J. D., Neumann, P., & Gauthier, L. (2015). Dynamics of *Apis mellifera* filamentous virus (AmFV) infections in honey bees and relationships with other parasites. *Viruses*, 7(5), 2654-2667. <https://doi.org/10.3390/v7052654>
